# Supplementary material
Source: publisher site journal article supplement (https://www.dovepress.com/article/247617)
Supplement: Supplementary file 1 [file get_supplementary_file.php]

**Fig. S1** The hemolysis ratio of different concentrations of LA-IR80/DOX ND. The data are presented as average ± standard derivation (n = 3).


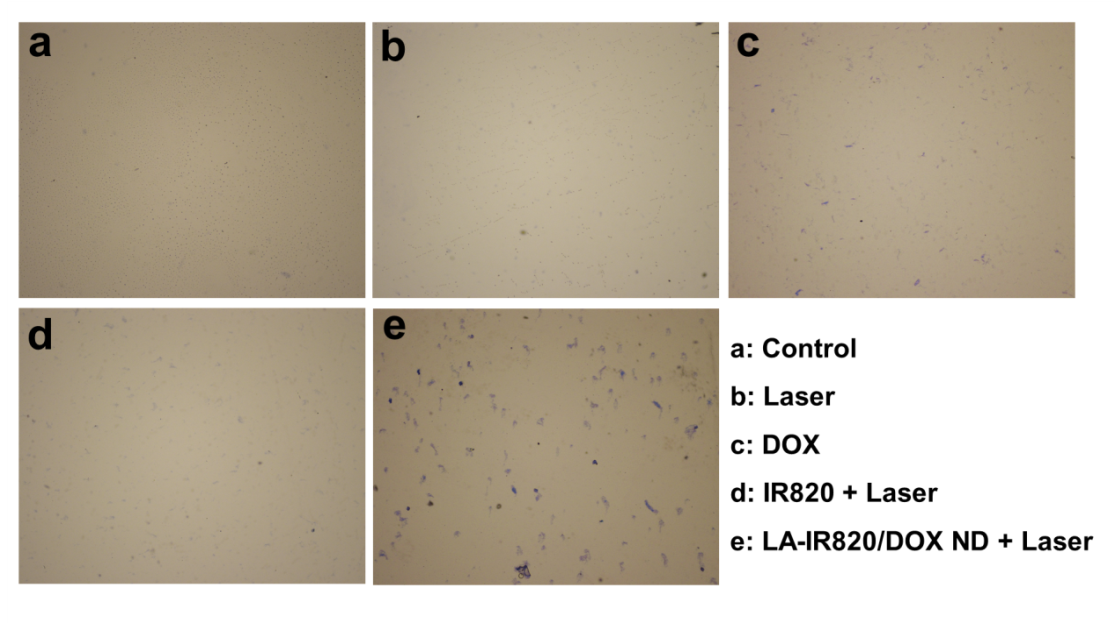


**Fig. S2** The trypan blue stained images of HepG2 cells incubated under different conditions. a-e represents the group of control, laser, DOX, IR820 + laser, and LA-IR820/DOX + laser respectively.
